# Supplementary material
Source: Springer Nature journal article supplement (https://www.springermedizin.de/resource/supplementary/13618_2013_87_MOESM2_ESM.pdf/9681166)

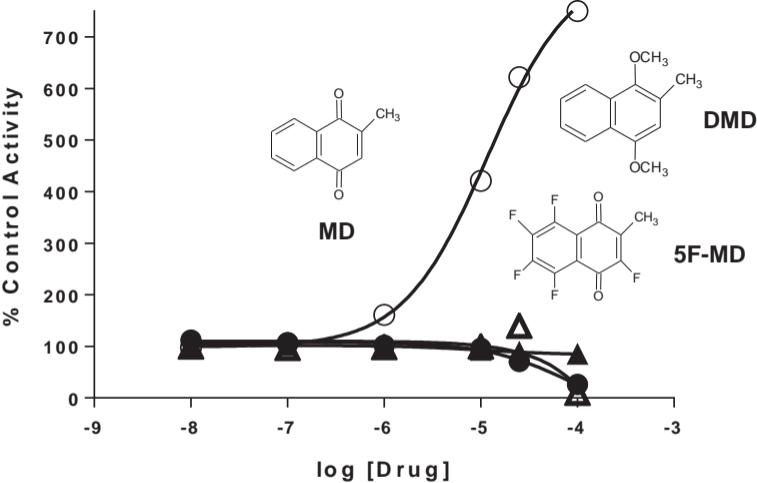

○ MD/HO-2

▲ MD/HO-1

● DMD/HO-2

△ 5F-MD/HO-2

Supplement: MOESM2 [file 9681166]
